# Supplementary material for: The human squamous oesophagus has widespread capacity for clonal expansion from cells at diverse stages of differentiation
Source: PubMed Central journal article supplement (PMC4283695; doi:10.1136/gutjnl-2013-306171), 2014-02-26
Supplement: gutjnl-2013-306171-s4.pdf [file gutjnl-2013-306171-s4.pdf]

**Supplementary table 2**

| <b>Gene</b>          | <b>Sequence</b>       | <b>Annealing temp</b> |
|----------------------|-----------------------|-----------------------|
| <b>GaPDH F</b>       | CAACAGCCTCAAGATCATCAG | 60° C                 |
| <b>GaPDH R</b>       | ATGGACTGTGGTCATGAGTC  |                       |
| <b>RPS18 F</b>       | ATCCCTGAAAAGTTCCAGCA  | 60° C                 |
| <b>RPS18 F</b>       | CCCTCTGGTGAGGTCAATG   |                       |
| <b>β ACTIN F</b>     | GGCATCCTCACCTGAAGTA   | 60° C                 |
| <b>β ACTIN R</b>     | GGGGTGTGAAGGTCTCAA    |                       |
| <b>CK13 F</b>        | TGCAGATCGAGAGCCTGAATG | 60° C                 |
| <b>CK13 R</b>        | TCCCTCATCTCTGCCAGCAC  |                       |
| <b>β1 INTEGRIN F</b> | TGTGAATGCCAAAGCGAAGG  | 60° C                 |
| <b>β1 INTEGRIN R</b> | CCAACACGCCCTTCATTGC   |                       |
| <b>VIMENTIN F</b>    | ACCGGAGACAGGTGCAGTCC  | 60° C                 |
| <b>VIMENTIN R</b>    | GCAGCTTCAACGGCAAAGTTC |                       |
| <b>P63 F</b>         | GAGGTTGGGCTGTTCATCAT  | 60° C                 |
| <b>P63 R</b>         | AGGAGATGAGAAGGGGAGGA  |                       |
