# Supplementary material for: The human squamous oesophagus has widespread capacity for clonal expansion from cells at diverse stages of differentiation
Source: HighWire-hosted journal article supplement (doi:10.1136/gutjnl-2013-306171), 2014-02-26

# Supplementary Figure 1

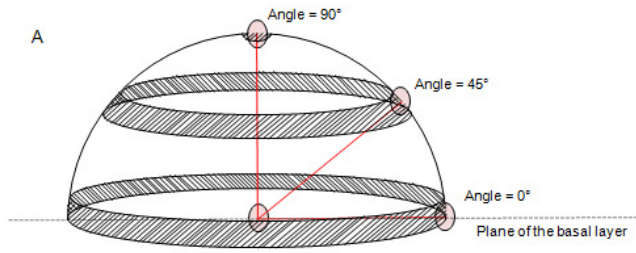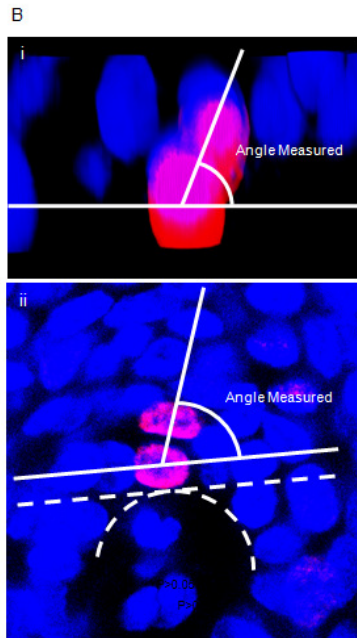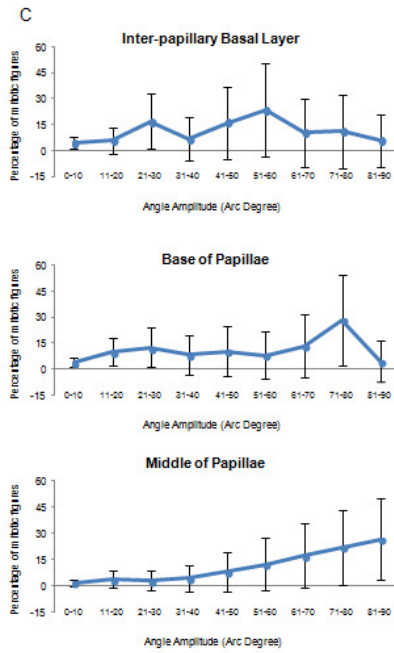

## Supplementary Figure 2

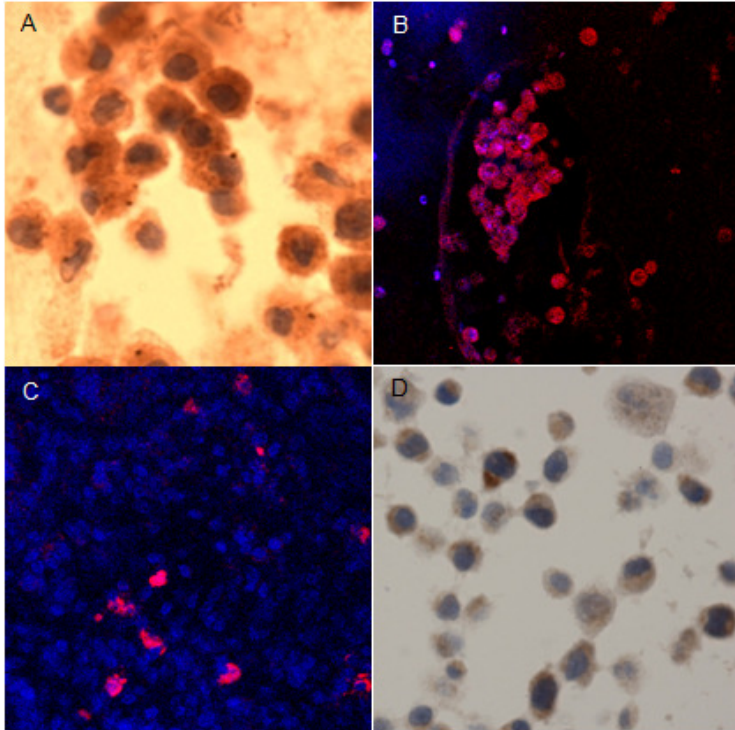

### Supplementary Figure 3

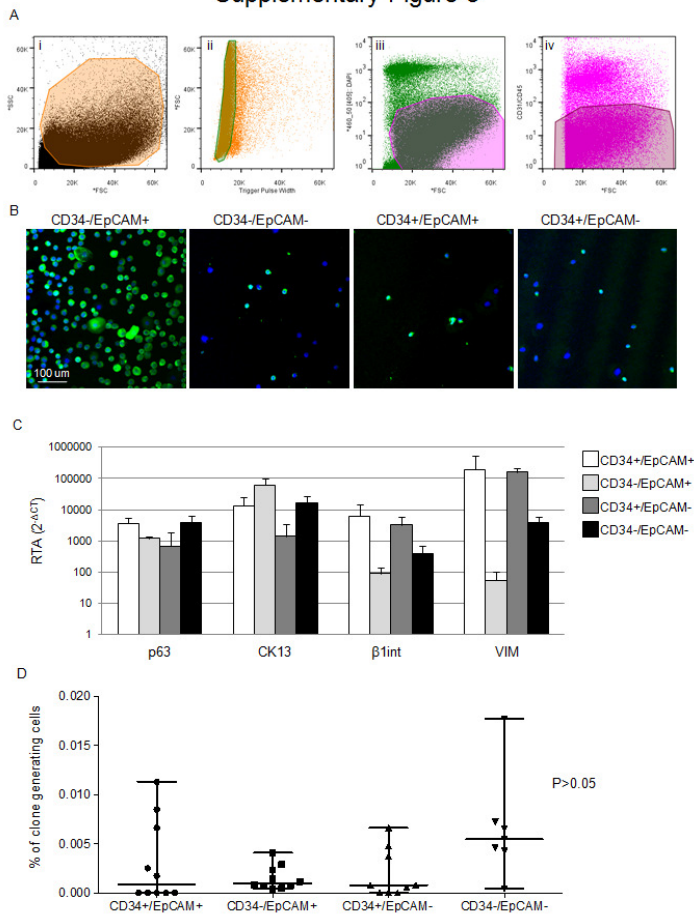

Supplement: gutjnl-2013-306171supp_figures.pdf [file gutjnl-2013-306171supp_figures.pdf]
