# Supplementary material for: The human squamous oesophagus has widespread capacity for clonal expansion from cells at diverse stages of differentiation
Source: HighWire-hosted journal article supplement (doi:10.1136/gutjnl-2013-306171), 2014-02-26
Supplement: gutjnl-2013-306171supp_Table1.pdf [file gutjnl-2013-306171supp_Table1.pdf]

**Supplementary table 1**

| <b>Antigen</b>     | <b>Species</b> | <b>Clonality</b>            | <b>Conjugation</b> | <b>Manufacturer</b> | <b>Technique</b> | <b>Sample stained</b>                                         | <b>Dilution</b> |
|--------------------|----------------|-----------------------------|--------------------|---------------------|------------------|---------------------------------------------------------------|-----------------|
| <b>Ki67</b>        | Mouse          | Monoclonal<br>(MIB-1)       | -                  | Dako                | IF, IHC          | Wholemounds<br>Primary cell clones<br>3D organotypic cultures | 1:100           |
| <b>Ki67</b>        | Mouse          | Monoclonal<br>(SP6)         | -                  | Abcam               | IF               | Wholemounds                                                   | 1:250           |
| <b>PH3</b>         | Rabbit         | Polyclonal                  | -                  | Millipore Upstate   | IF               | Wholemounds                                                   | 1:250           |
| <b>β1-integrin</b> | Mouse          | Monoclonal<br>(4B7R)        | FITC               | Santa Cruz          | IF               | Wholemounds                                                   | 1:100           |
| <b>MCSP</b>        | Mouse          | Monoclonal<br>(9.2.27)      | -                  | BD Bioscience       | IF               | Wholemounds                                                   | 1:100           |
| <b>PanCK</b>       | Rabbit         | Polyclonal                  | -                  | Acris Antibodies    | IF, IHC          | Wholemounds<br>Primary cell clones<br>3D organotypic cultures | 1:500           |
| <b>CD34</b>        | Mouse          | Monoclonal<br>(581)         | -                  | BD Bioscience       | IF               | Wholemounds                                                   | 1:100           |
| <b>CD31</b>        | Mouse          | Monoclonal<br>(CJ70A)       | -                  | Dako                | IF               | Wholemounds                                                   | 1:200           |
| <b>CD45</b>        | Mouse          | Monoclonal<br>(ZB11+PD7/26) | -                  | Dako                | IF               | Wholemounds                                                   | 1:100           |

|                       |        |                      |    |                                      |         |                                                |       |
|-----------------------|--------|----------------------|----|--------------------------------------|---------|------------------------------------------------|-------|
| <b>Chromogranin-A</b> | Rabbit | Monoclonal (DRM015)  | -  | Acris Antibodies                     | IF      | Wholemounds                                    | 1:50  |
| <b>F4/80</b>          | Rat    | Monoclonal (A3-1)    | -  | Abcam                                | IF      | Wholemounds                                    | 1:200 |
| <b>S-100</b>          | Rabbit | Polyclonal           | -  | Abcam                                | IF      | Wholemounds                                    | 1:100 |
| <b>CK13</b>           | Mouse  | Monoclonal           | -  | Novocastra                           | IF, IHC | Primary cell clones<br>3D organotypic cultures | 1:200 |
| <b>CK8/18</b>         | Mouse  | Monoclonal (5D3)     | -  | Vector laboratories                  | IF      | Primary cell clones                            | 1:100 |
| <b>Vimentin</b>       | Rabbit | Monoclonal (VP-RM17) | -  | Vector laboratories                  | IF, IHC | Primary cell clones<br>3D organotypic cultures | 1:250 |
| <b>EpCAM</b>          | Mouse  | Monoclonal (VU1D9)   | -  | Cell Signalling                      | IHC     | Normal oesophagus                              | 1:500 |
| <b>β1-integrin</b>    | Mouse  | Monoclonal (18/CD29) | -  | BD Bioscience                        | IHC     | 3D organotypic cultures                        | 1:100 |
| <b>p63</b>            | Mouse  | Monoclonal (4A4)     | -  | Dako                                 | IHC     | 3D organotypic cultures                        | 1:100 |
| <b>MCM2</b>           | Mouse  | Monoclonal           | -  | Prof.s Steve Dilworth and Ron Laskey | IHC     | 3D organotypic cultures                        | 1:500 |
| <b>EpCAM</b>          | Mouse  | Monoclonal (9C4)     | PE | Biolegend                            | FC      | Fresh primary cells                            | 1:25  |

|             |       |                      |        |               |    |                     |       |
|-------------|-------|----------------------|--------|---------------|----|---------------------|-------|
| <b>CD34</b> | Mouse | Monoclonal<br>(581)  | FITC   | Biolegend     | FC | Fresh primary cells | 1:500 |
| <b>CD31</b> | Mouse | Monoclonal<br>(WM59) | Biotin | Biolegend     | FC | Fresh primary cells | 1:500 |
| <b>CD45</b> | Mouse | Monoclonal<br>(HI30) | Biotin | BD Bioscience | FC | Fresh primary cells | 1:10  |

---
